# Supplementary material for: Bandgap matching-triggered self-sustaining photocatalytic oxidation
Source: Royal Society of Chemistry journal article supplement (doi:10.1039/d3cy00625e), 2023-01-01
Supplement: d3cy00625e1.pdf [file d3cy00625e1.pdf]

Supplementary Information for:

**Band gap matching-triggered self-sustaining photocatalytic  
oxidation**

Weiwei Cheng,<sup>a</sup> Zhiqin Yuan,<sup>\*a</sup> Yanjun Lin<sup>a</sup>, and Chao Lu<sup>\*ab</sup>

*<sup>a</sup> State Key Laboratory of Chemical Resource Engineering, College of Chemistry,  
College of Chemical Engineering, Beijing University of Chemical Technology,  
Beijing 100029, China*

*<sup>b</sup> Green Catalysis Center, College of Chemistry, Zhengzhou University, Zhengzhou  
450001, China*

**\*Corresponding author**

\*Email: yuanzq@mail.buct.edu.cn (Z. Yuan). Tel./Fax: +86 10 64411957.

\*Email: luchao@mail.buct.edu.cn (C. Lu). Tel./Fax: +86 10 64411957.

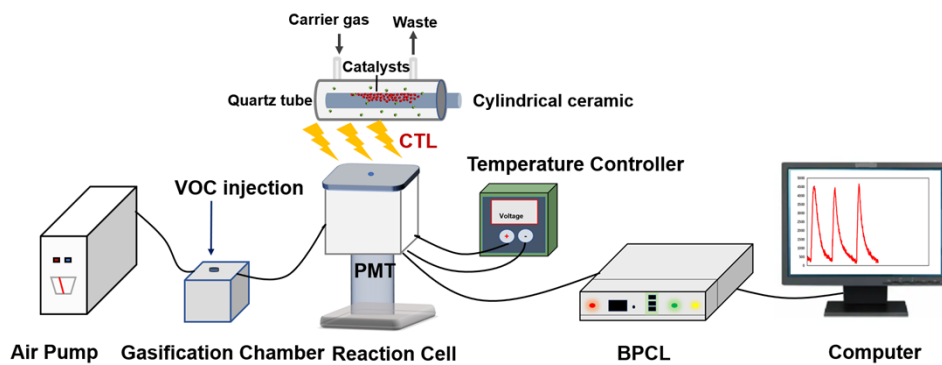

**Fig. S1** Schematic diagram of the components of the CTL instrumentation.

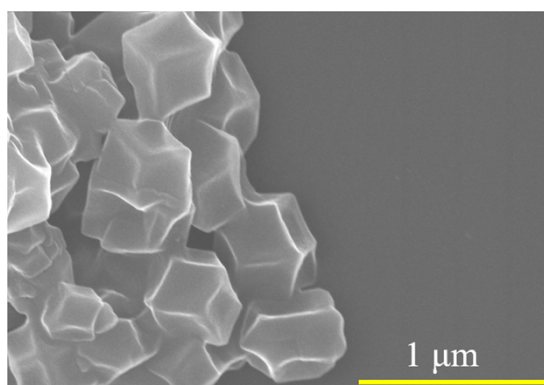

**Fig. S2** SEM image of ZIF-67 synthesized without CTAB.

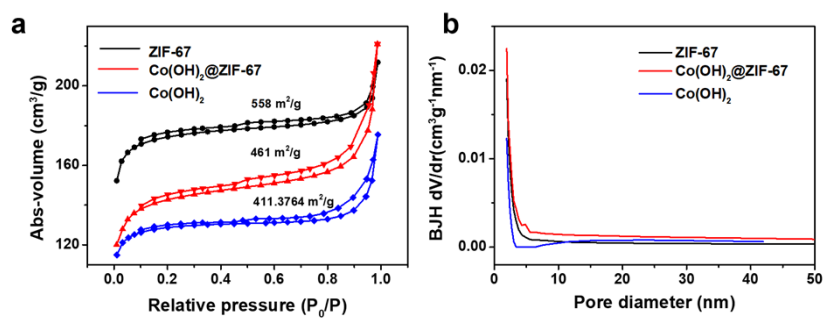

**Fig. S3** N<sub>2</sub> isothermal adsorption and desorption curves and pore size distribution of ZIF-67, Co(OH)<sub>2</sub>@ZIF-67 and Co(OH)<sub>2</sub>.

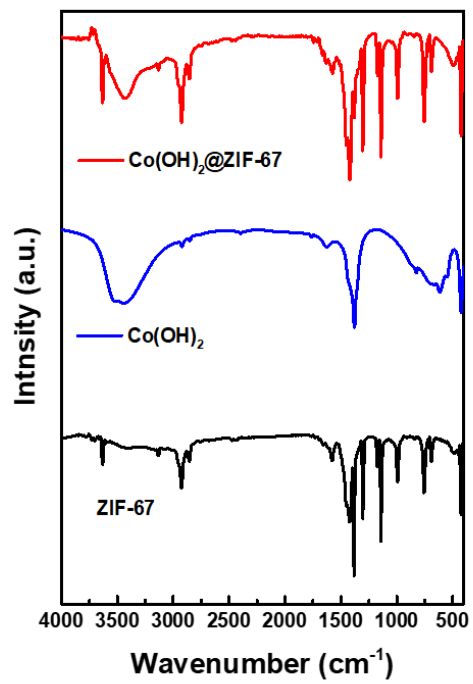

**Fig. S4** FT-IR spectra of ZIF-67, Co(OH)<sub>2</sub>, and Co(OH)<sub>2</sub>@ZIF-67.

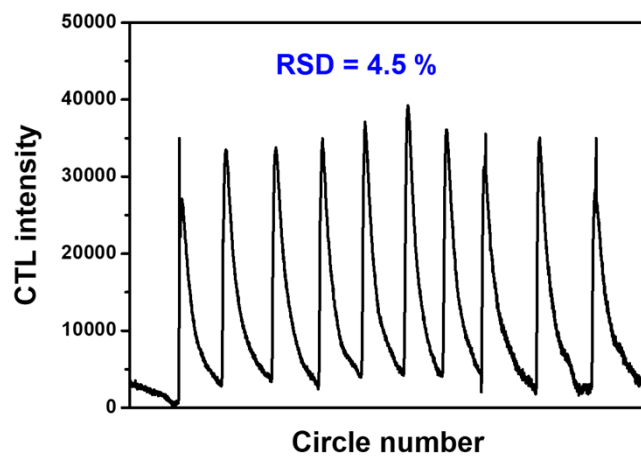

**Fig. S5** Cycling experiments of photocatalytic oxidation of acetone on  $\text{Co(OH)}_2\text{@ZIF-67}$  the catalyst surface. CTL measurement conditions: air flow rate  $200 \text{ mL min}^{-1}$ , reaction temperature  $150 \text{ }^\circ\text{C}$ , negative pressure  $-1000 \text{ V}$ , acquisition interval  $0.1 \text{ s}$ .

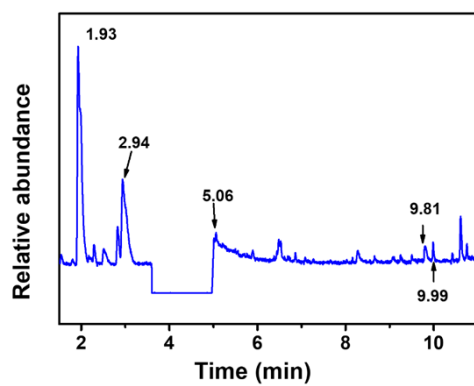

**Fig. S6** Gas chromatography-mass spectrometry (GC-MS) analysis of the products collected in acetonitrile following CTL catalyzed by acetone over catalyst  $\text{Co}(\text{OH})_2@$  ZIF-67.

**Table S1** Conversion rates of acetone on clean ceramic rod surfaces, ZIF-67, Co(OH)<sub>2</sub>@ZIF-67 and Co(OH)<sub>2</sub> surfaces. The conversion efficiency (CE) of acetone was calculated through  $1-(c_1/c_0)\times 100\%$  equation.

| Catalysts                   | $c_0$ (ppm) |      | $c_1$ (ppm) |      | CE (%)     |
|-----------------------------|-------------|------|-------------|------|------------|
| clean ceramic rod           | 2000        | 1264 | 1427        | 1345 | 32.7 ± 4.1 |
|                             | 1000        | 725  | 757         | 735  | 26.1 ± 1.6 |
|                             | 500         | 471  | 460         | 465  | 6.9 ± 1.1  |
| ZIF-67                      | 2000        | 544  | 526         | 535  | 73.3 ± 0.5 |
|                             | 1000        | 240  | 260         | 231  | 75.6 ± 1.5 |
|                             | 500         | 68   | 70          | 92   | 84.7 ± 2.7 |
| Co(OH) <sub>2</sub> @ZIF-67 | 2000        | 238  | 268         | 257  | 87.3 ± 0.8 |
|                             | 1000        | 24   | 41          | 32   | 96.8 ± 0.9 |
|                             | 500         | 13   | 7           | 12   | 97.9 ± 0.6 |
| Co(OH) <sub>2</sub>         | 2000        | 271  | 298         | 252  | 86.3 ± 1.2 |
|                             | 1000        | 132  | 117         | 125  | 87.5 ± 0.8 |
|                             | 500         | 45   | 30          | 32   | 92.9 ± 1.6 |



**Table S2** Comparison of acetone catalytic oxidation performances with proposed  $\text{Co(OH)}_2@\text{ZIF-67}$  and other reported catalysts.

| Ref          | Catalyst                                    | Concentration<br>ppm                                     | Conversion<br>rate | Conditions                                                             |
|--------------|---------------------------------------------|----------------------------------------------------------|--------------------|------------------------------------------------------------------------|
| 1            | $\text{SnO}_2\text{-Zn}_2\text{SnO}_4$      | 300 ppm                                                  | 11% (140 min)      | 25 °C, 3 W LED<br>( $\lambda = 420 \pm 10 \text{ nm}$ )                |
| 2            | $\text{Zr}_{0.4}\text{Co}_{0.6}\text{O}_x$  | 40000<br>$\text{mL}\cdot\text{g}^{-1}\cdot\text{h}^{-1}$ | 90%                | 208 °C                                                                 |
| 3            | $\text{MnAl}_{0.5}$ oxides                  | 1000 ppm                                                 | 90%                | 165 °C                                                                 |
| 4            | $\text{Pd}_{0.01}\text{Mn}_{0.1}/\text{Ti}$ | 1000 ppm                                                 | 95%                | 259 °C                                                                 |
| 5            | $\text{TiO}_2$                              | 300 ppm                                                  | 100% (120 min)     | 15W@365 nm,<br>0.41 W/cm <sup>2</sup> ,                                |
| 6            | $\text{TiO}_2$                              | 650 ppm                                                  | 100% (30 min)      | 10.2 mW/cm <sup>2</sup><br>$\lambda_{\text{max}} \sim 373 \text{ nm}$  |
| This<br>work | $\text{Co(OH)}_2@\text{ZIF-67}$             | 1000 ppm                                                 | 96%                | 150 °C, $\lambda = 400\text{-}600 \text{ nm}$<br>without external lamp |

- [1] Y. Li, X. Wu, W. Ho, K. Lv, Q. Li, M. Li, S. C. Lee, *Chem. Eng. J.*, 2018, **336**, 200–210.  
 [2] X. Zhang, M. Li, X. Cui, X. Niu, Y. Zhu, *Chem. Eng. J.*, 2023, 465, 142857.  
 [3] J.-R. Li, W.-P. Zhang, J. Zhao, M. Tian, K. Wu, H. Xiao, C. He, *ACS Appl. Mater. Interfaces*, 2022, **14**, 36536–36550.  
 [4] Q. Zhao, Y. Ge, K. Fu, Y. Zheng, Q. Liu, C. Song, N. Ji, D. Ma, *Appl. Surf. Sci.*, 2019, **496**, 143579.  
 [5] T. Shi, Y. Duan, K. Lv, Z. Hu, Q. Li, M. Li, X. Li, *Front. Chem.*, 2018, **6**, 175.  
 [6] D.S. Selishchev, N.S. Kolobov, A.A. Pershin, D.V. Kozlov, *Appl. Catal., B*, 2017, **200**, 503–513.

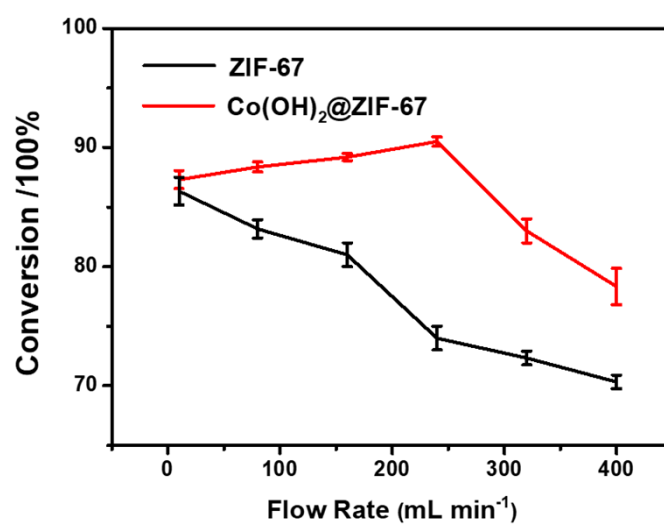

**Fig. S7** Conversion of acetone at different carrier gas flow rates,  $c_0=2000$  ppm.

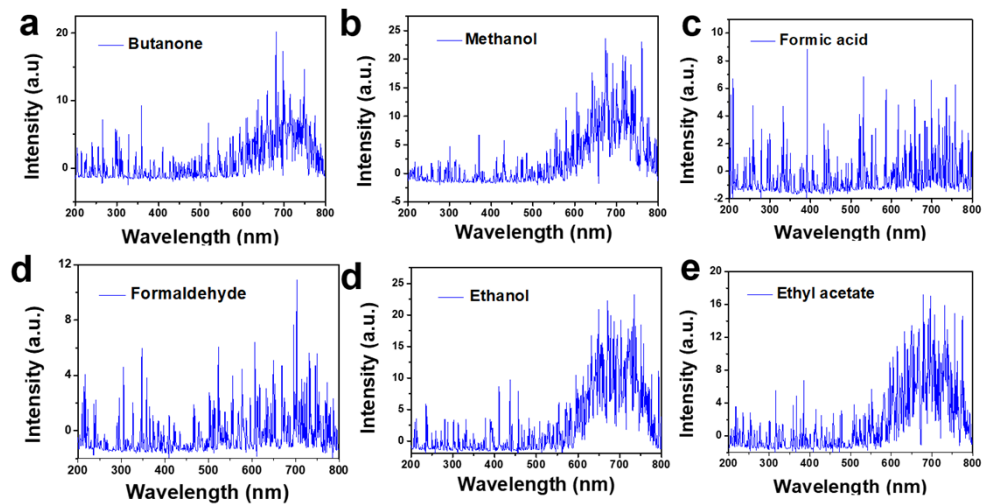

**Fig. S8** CTL emission spectra of various VOCs on the surface of  $\text{Co}(\text{OH})_2@\text{ZIF-67}$ .

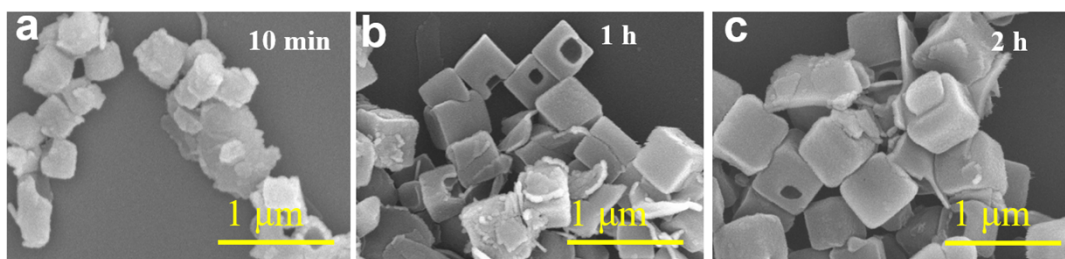

**Fig. S9** SEM images of  $\text{Co(OH)}_2@\text{ZIF}$  67-10min,  $\text{Co(OH)}_2@\text{ZIF}$  67-1h,  $\text{Co(OH)}_2@\text{ZIF}$  67-2h.

**Table S3** Conversion efficiency (CE) of ethanol, butanone, ethyl acetate, acetaldehyde and formic acid on Co(OH)<sub>2</sub>@ZIF-67 surfaces.

| VOC           | $c_0$ (ppm) | $c_1$ (ppm) | CE in dark<br>(%) | $c_1$ (ppm) | CE with LED<br>(%) |
|---------------|-------------|-------------|-------------------|-------------|--------------------|
| Ethanol       | 2000        | 1790        | 10.5              | 1286        | 35.7               |
| Butanone      | 2000        | 1330        | 33.5              | 1076        | 46.2               |
| Ethyl acetate | 2000        | 1540        | 23.0              | 1172        | 41.4               |
| Acetaldehyde  | 2000        | 1572        | 21.7              | 1504        | 24.8               |
| Formic acid   | 2000        | 1856        | 7.2               | 1800        | 10.0               |

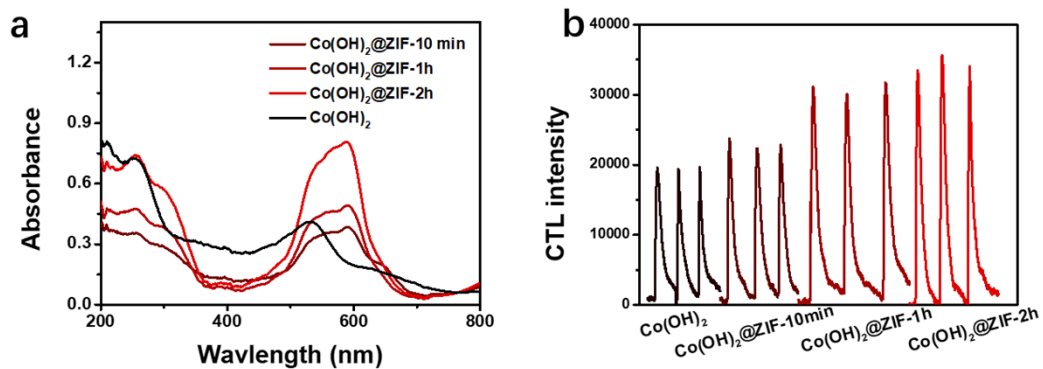

**Fig. S10** (a) UV-vis absorbance of  $\text{Co(OH)}_2$ ,  $\text{Co(OH)}_2@ZIF-67-10\text{min}$ ,  $\text{Co(OH)}_2@ZIF-67-1\text{h}$  and  $\text{Co(OH)}_2@ZIF-67-2\text{h}$ ; (b) CTL signals of acetone on the surfaces of  $\text{Co(OH)}_2$ ,  $\text{Co(OH)}_2@ZIF-67-10\text{min}$ ,  $\text{Co(OH)}_2@ZIF-67-1\text{h}$  and  $\text{Co(OH)}_2@ZIF-67-2\text{h}$ .

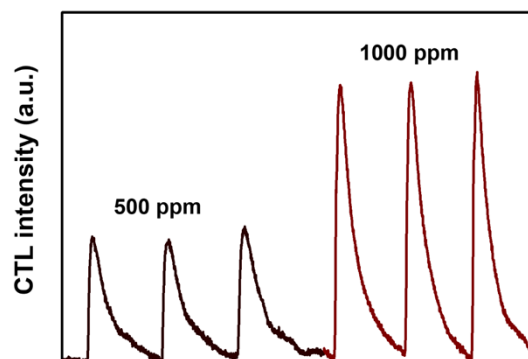

**Fig. S11** CTL signals of acetone at 500 and 1000 ppm on Co(OH)<sub>2</sub>@ZIF-67 surface.

CTL measurement conditions: air flow rate 200 mL/min, reaction temperature 150 °C,

negative pressure -1000 V, acquisition interval 0.1s.

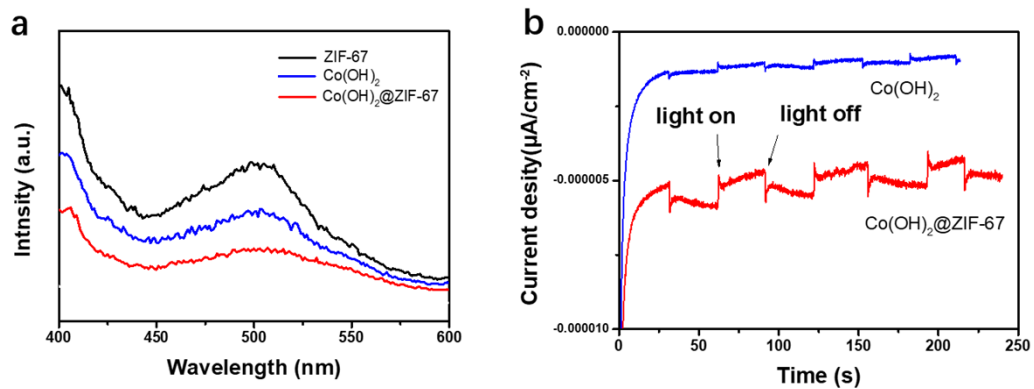

**Fig. S12** (a) Fluorescence spectra of ZIF-67,  $\text{Co(OH)}_2@ZIF-67$  and  $\text{Co(OH)}_2$ .

Experimental conditions: excitation wavelength 380 nm, slit 5 nm, solvent methanol.

(b) Photogenerated current plots of  $\text{Co(OH)}_2$  and  $\text{Co(OH)}_2@ZIF-67$ .



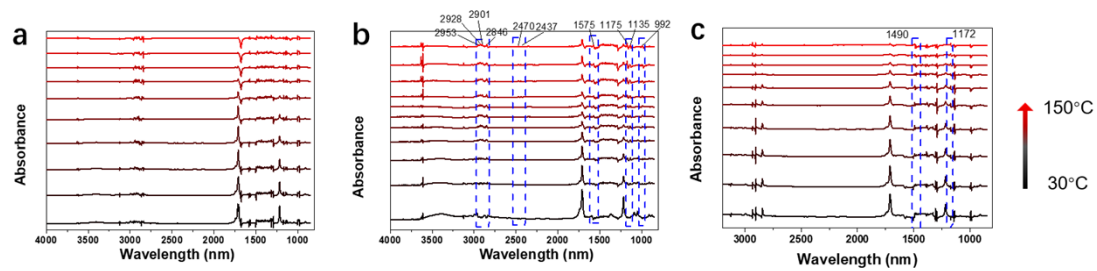

**Fig. S13** In situ-IR spectra of CTL intermediates from acetone on the surface of ZIF-67 (a),  $\text{Co(OH)}_2@ZIF-67$  (b), and  $\text{Co(OH)}_2$  (c) catalysts. Acetone was added by the bubbling method at a rate of  $10\text{ }^\circ\text{C}/\text{min}$  and the test range was  $30\text{-}150\text{ }^\circ\text{C}$ .

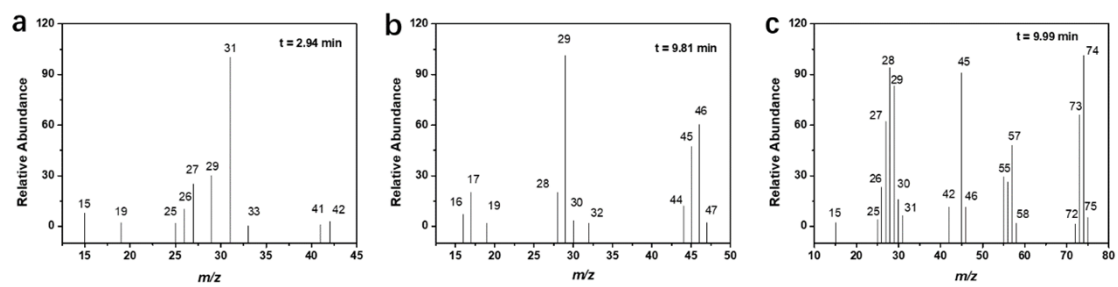

**Fig. S14** MS spectra of the main products from exhaust gas.

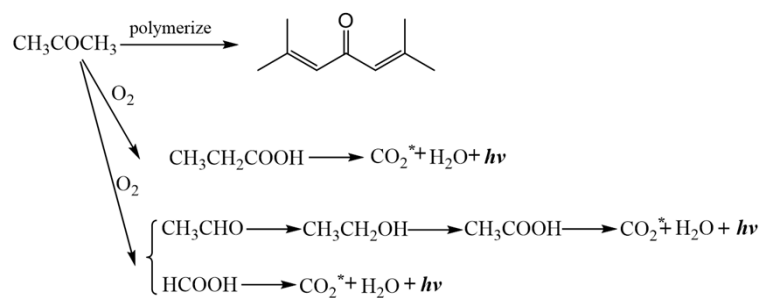

**Fig. S15** Inference diagram of the oxidation process of acetone on the  $\text{Co}(\text{OH})_2@ZIF-67$  surface reaction.

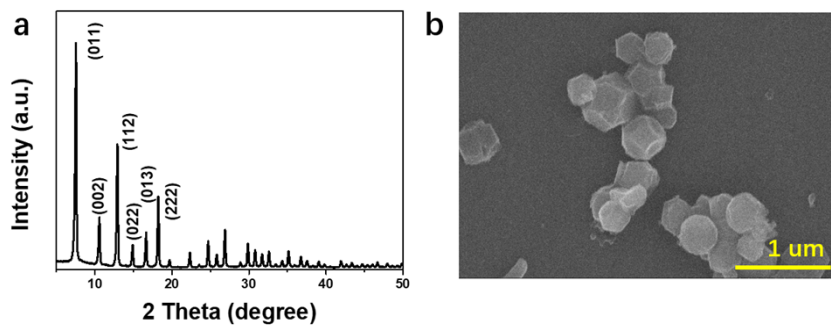

**Fig. S16** XRD and SEM image diagram of ZIF-8.
